# Supplementary material for: Using ocean surface paleo-density to evaluate PMIP3 and PMIP4 Last Glacial Maximum climate simulations
Source: Copernicus journal article supplement (doi:10.5194/egusphere-2026-254), 2026-02-02
Supplement: Supplementary file 1 [file egusphere-2026-254-supplement.pdf]

# Supplementary Materials for:

## **Using ocean surface paleo-density to evaluate PMIP3 and PMIP4 Last Glacial Maximum climate simulations.**

Barathieu H  lo  se<sup>1</sup>, Caley Thibaut<sup>1</sup>, Kageyama Masa<sup>2</sup>, Swingedouw Didier<sup>1</sup>, Braconnot Pascale<sup>2</sup>

<sup>1</sup>Univ. Bordeaux, CNRS, Bordeaux INP, EPOC, UMR 5805, 33600 Pessac, France

<sup>2</sup>Laboratoire des Sciences du Climat et de l'Environnement – Institut Pierre-Simon Laplace (LSCE-IPSL), UMR CEA-CNRS-UVSQ, Universit   Paris-Saclay, Gif-sur-Yvette, France.

Correspondence to: H  lo  se Barathieu (*heloise.barathieu@u-bordeaux.fr*)

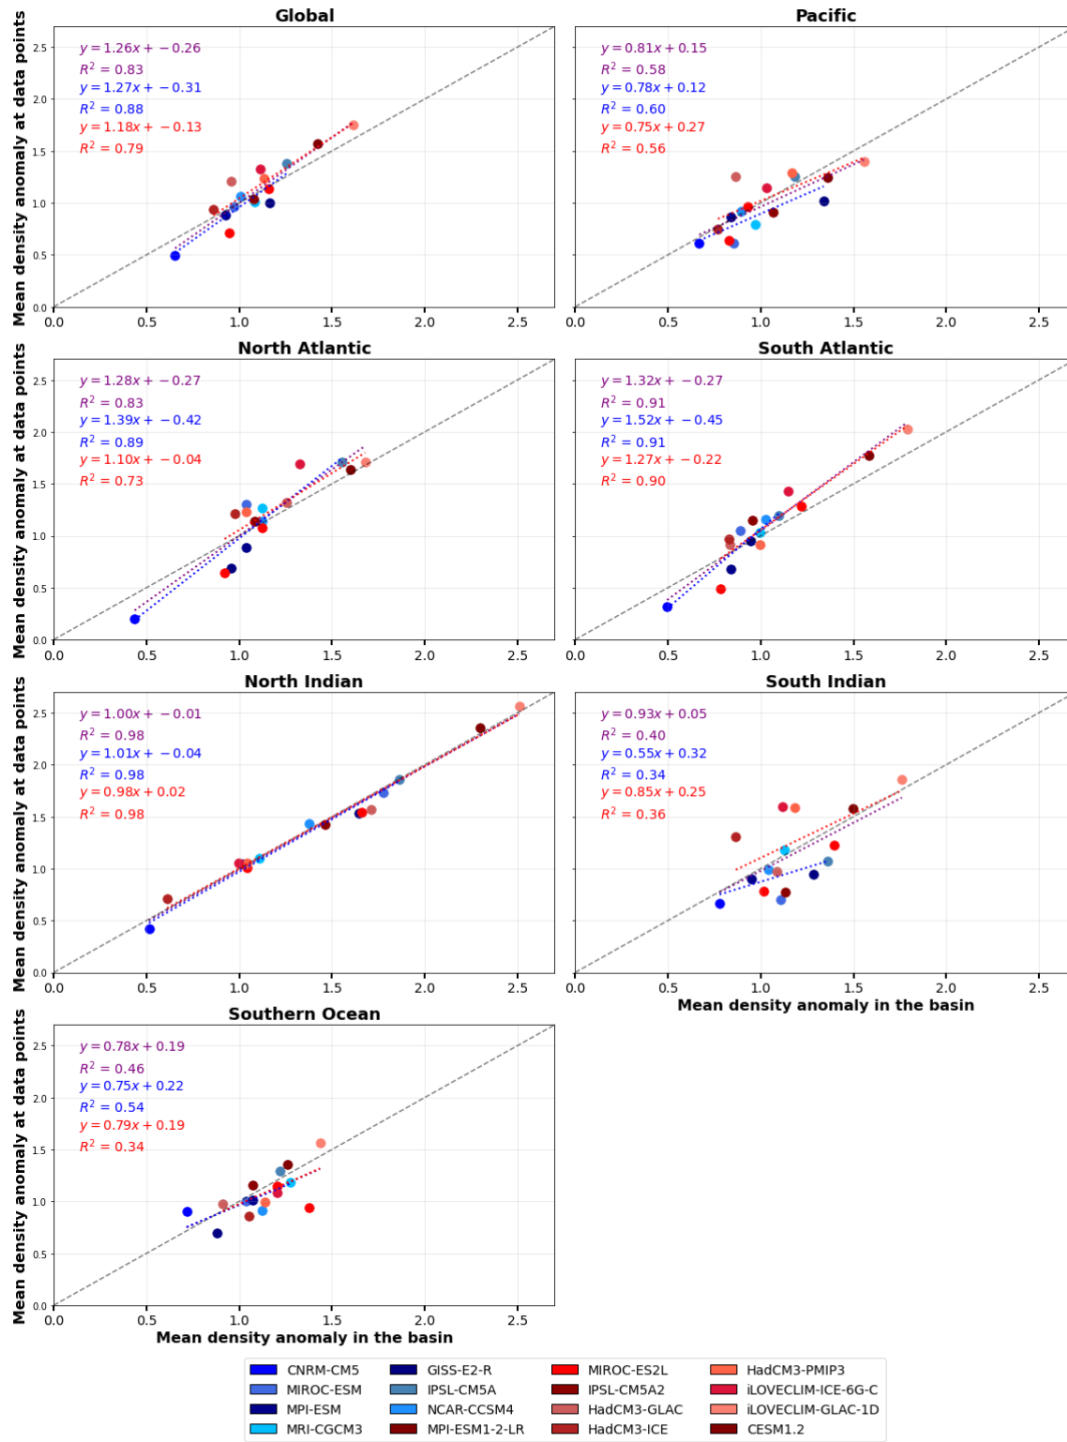

**Figure S1:** Pseudo-proxy test for ocean surface density. Comparison between the mean density anomalies ( $\text{kg/m}^3$ ) averaged across all model grid points (x-axis) and the mean density anomalies ( $\text{kg/m}^3$ ) averaged over proxy reconstruction sites (y-axis). PMIP3 simulations are shown in blue, and PMIP4 simulations in red. The purple regression line and  $R^2$  represent the fit across all model simulations combined (PMIP3 + PMIP4). The “Global” panel includes all proxy locations from the individual basins shown.

a)

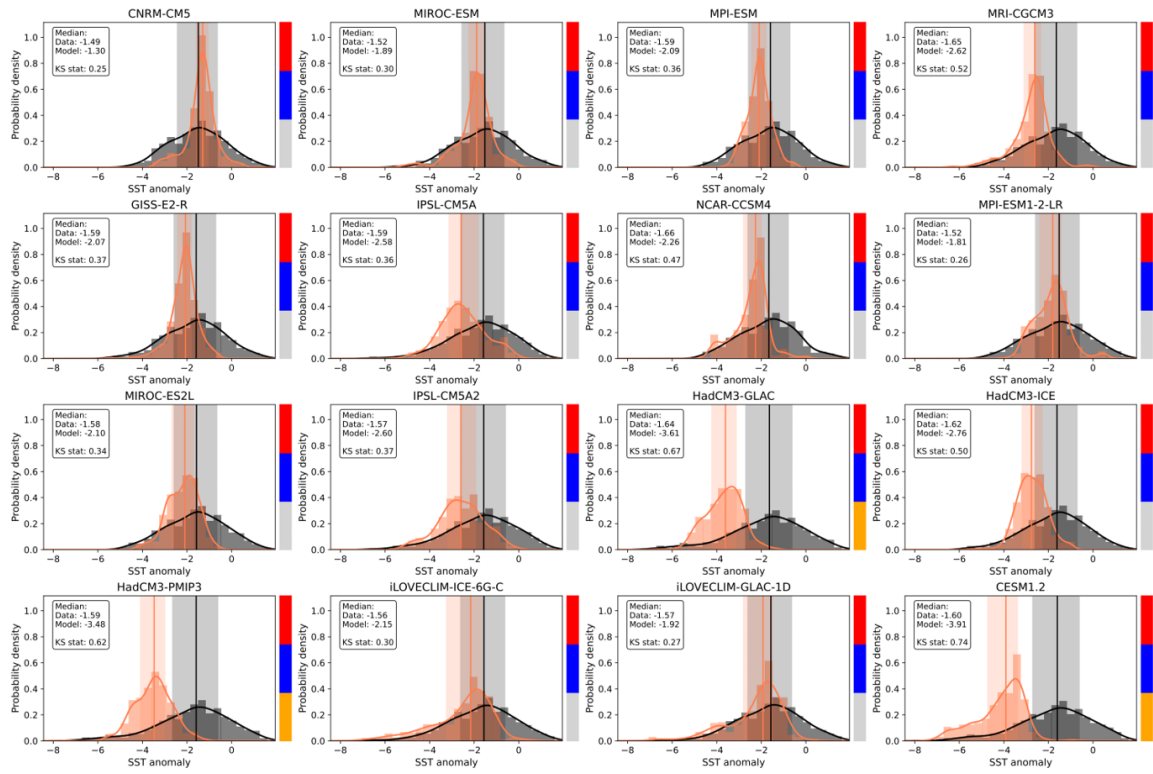

b)

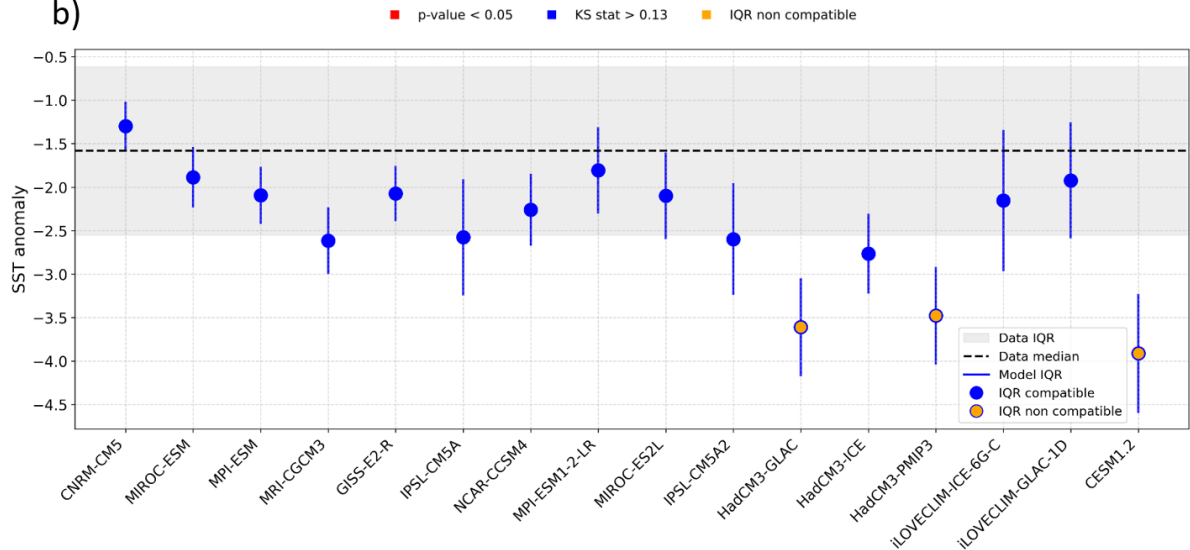

19

**Figure S2:** (a) Distribution histograms of SST anomalies (LGM-PI, °C) for each ocean basin. SST reconstructions from the MARGO database (MARGO project, 2009) are shown in black, and model simulations in orange. Kernel Density Estimates (KDEs) illustrate the central tendency and shape of the distributions. Vertical lines indicate medians, and shaded envelopes represent interquartile ranges (IQRs), capturing spread independent of outliers. Histograms show frequency and complement the KDEs. Extreme values were excluded via IQR filtering. Uncertainties from reconstructions and model spread are not shown, as the focus is on comparing distributional shapes. Colored indicators at the right of each panel show whether any of the following criteria are not met: p-value < 0.05, KS statistic  $\geq 0.13$ , and absolute median difference < 0.2. A colored flag indicates a failed criterion. (b) Comparison of observed and simulated SST anomaly statistics at the global scale. The shaded grey band indicates the interquartile range (IQR) of the reconstructions data (from MARGO project, 2009), and the dashed black line marks the median of the reconstructions. For each model simulation, the blue vertical bars represent the modelled IQR, while the circular markers denote the model median. Blue markers indicate model simulations with IQR values consistent with reconstructions (IQR compatible), whereas orange markers highlight models with larger deviations (IQR non compatible).

a)

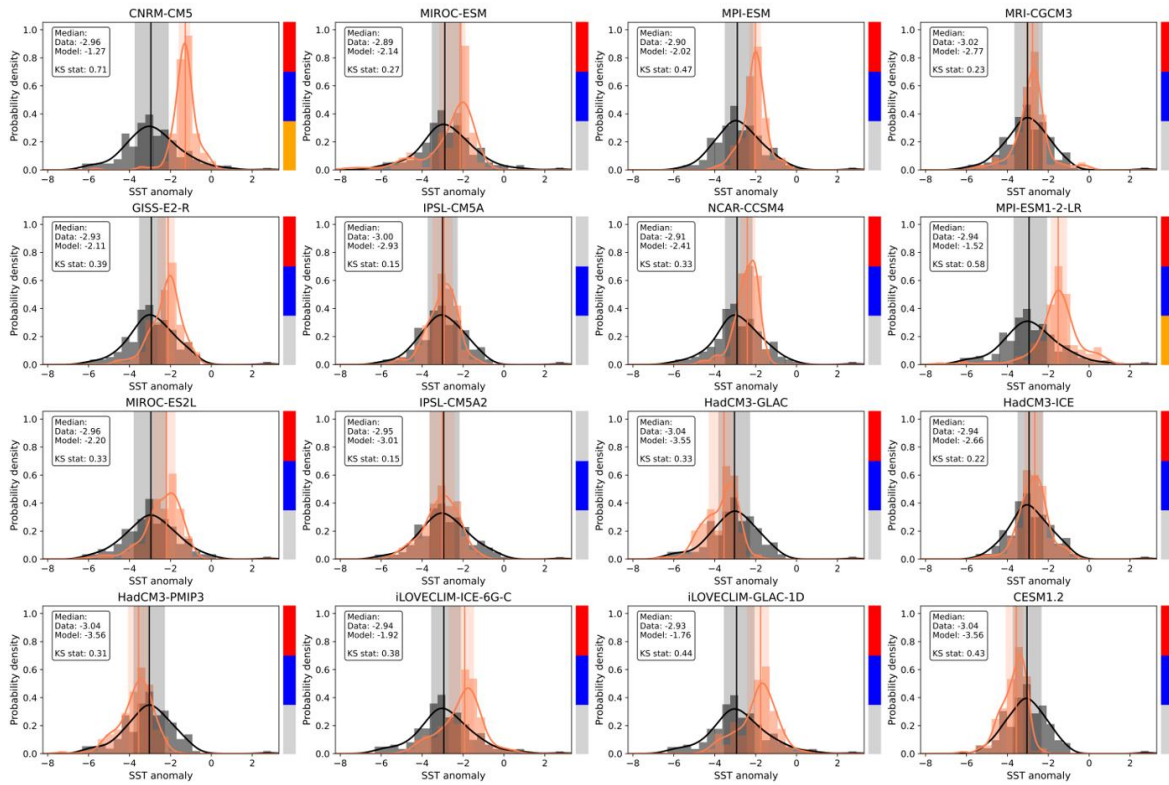

b)

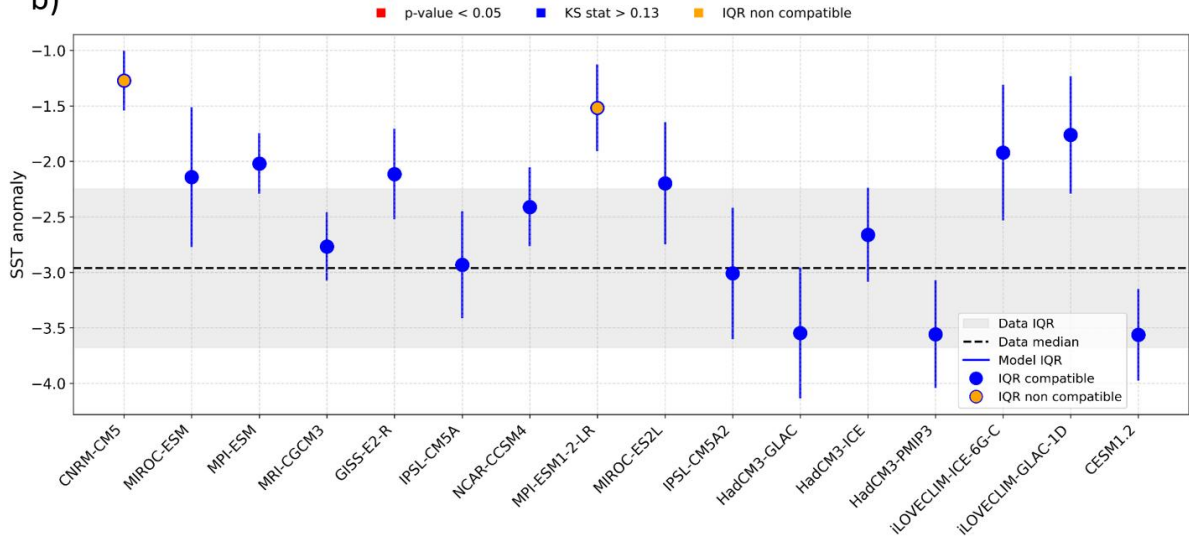

**Figure S3:** (a) Distribution histograms of SST anomalies (LGM-PI, °C) for each ocean basin. SST reconstructions from the Tierney database (Tierney et al. 2020) are shown in black, and model simulations in orange. Kernel Density Estimates (KDEs) illustrate the central tendency and shape of the distributions. Vertical lines indicate medians, and shaded envelopes represent interquartile ranges (IQRs), capturing spread independent of outliers. Histograms show frequency and complement the KDEs. Extreme values were excluded via IQR filtering. Uncertainties from reconstructions and model spread are not shown, as the focus is on comparing distributional shapes. Colored indicators at the right of each panel show whether any of the following criteria are not met: p-value < 0.05, KS statistic ≥ 0.13, and absolute median difference < 0.2. A colored flag indicates a failed criterion. (b) Comparison of observed and simulated SST anomaly statistics at the global scale. The shaded grey band indicates the interquartile range (IQR) of the reconstructions data (from Tierney et al. 2020), and the dashed black line marks the median of the reconstructions. For each model simulation, the blue vertical bars represent the modelled IQR, while the circular markers denote the model median. Blue markers indicate model simulations with IQR values consistent with reconstructions (IQR compatible), whereas orange markers highlight models with larger deviations (IQR non compatible).

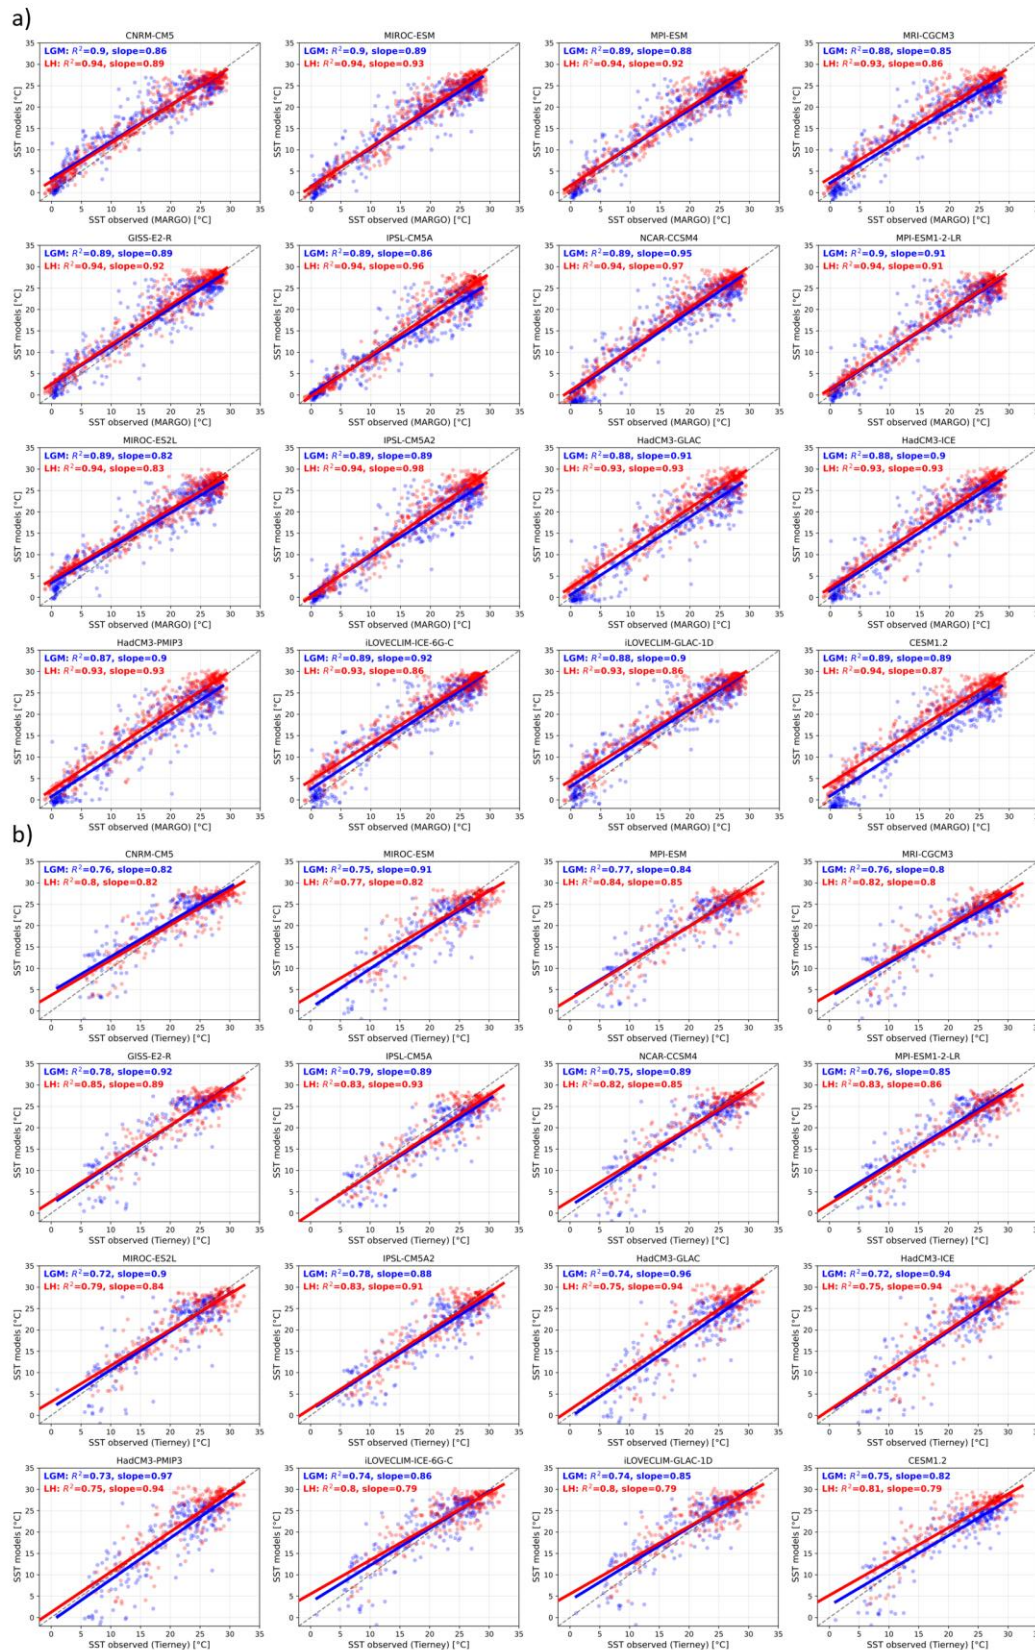

**Figure S4:** Linear regressions between SST from proxy-based reconstructions (x-axis, °C) and model simulations (y-axis, °C), aggregated at the global scale (across all selected basins). Results are shown for the LGM period (blue) and the piControl period (red). The slope and  $R^2$  values correspond to standard linear regressions, without accounting for uncertainties on the x-axis (the Monte Carlo method was not applied here). **(a)** Proxy-data reconstructions from MARGO project (2009). **(b)** Proxy-data reconstructions from Tierney et al. (2020).



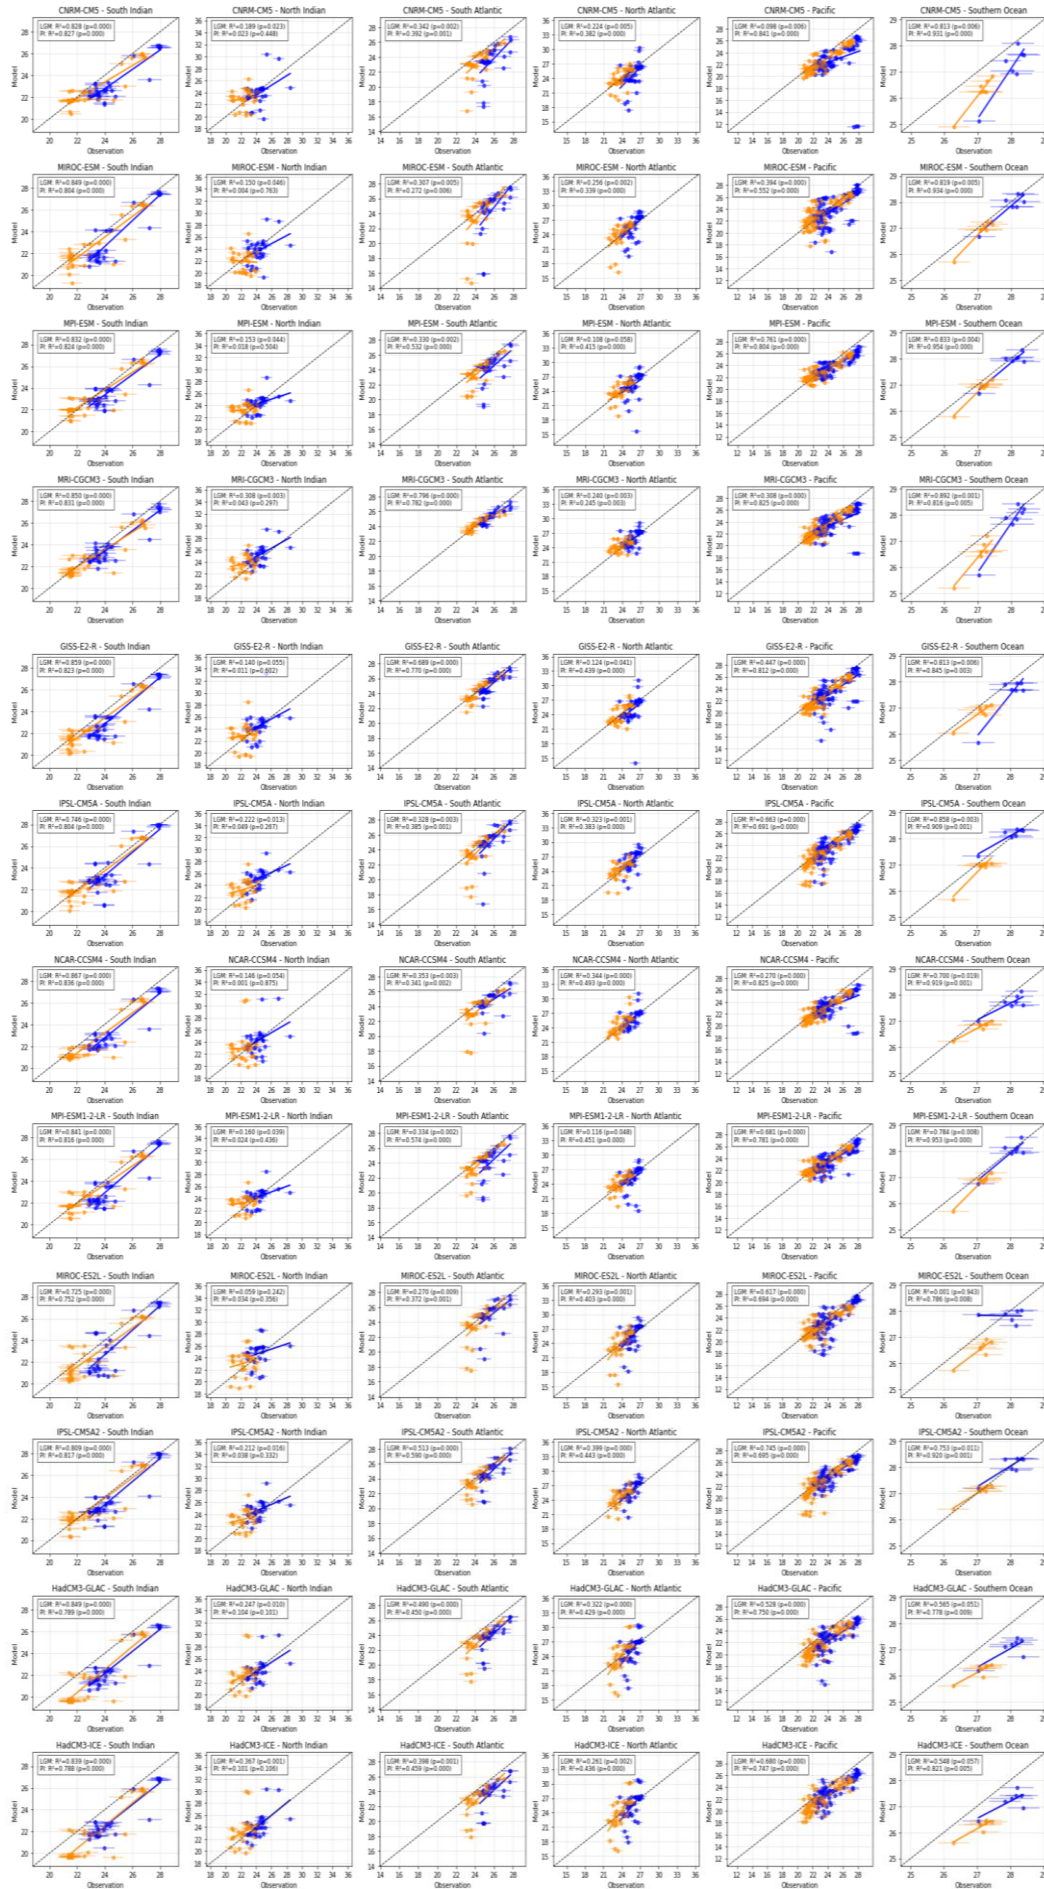

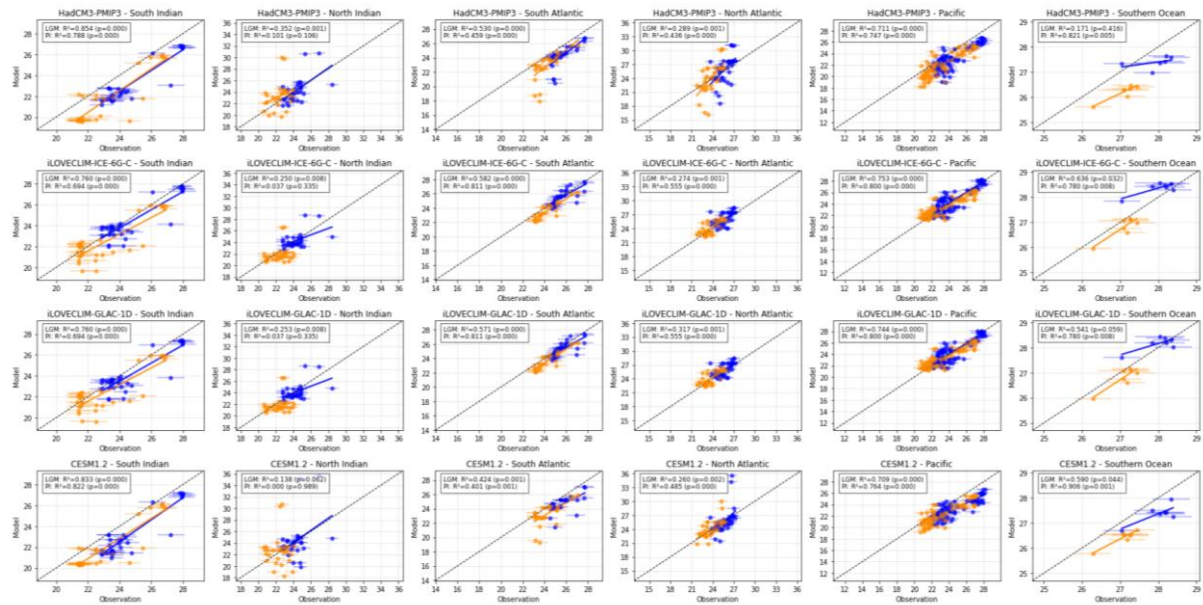

**Figure S5:** Linear regressions between surface absolute density ( $\text{kg/m}^3$ ) from proxy-based reconstructions (x-axis) and model simulations (y-axis), for each basins and each model simulation. Results are shown for the LGM period (blue) and the piControl period (orange). Error bars on the x-axis represent the 95% confidence intervals of the reconstructed values. The  $R^2$  values correspond to standard linear regressions, without accounting for uncertainties on the x-axis (the Monte Carlo method was not applied here).

## Ocean: South Indian

| Period | Model              | N points | R <sup>2</sup> (Ref) | MC R <sup>2</sup> ± $\sigma$ | p-val R <sup>2</sup> | Slope (Ref) | MC Slope ± $\sigma$ |
|--------|--------------------|----------|----------------------|------------------------------|----------------------|-------------|---------------------|
| LGM    | CNRM-CM5           | 31       | 0.83                 | 0.72 ± 0.06                  | < 0.05               | 0.89        | 0.78 ± 0.05         |
| LGM    | MIROC-ESM          | 28       | 0.85                 | 0.74 ± 0.05                  | < 0.05               | 1.19        | 1.04 ± 0.07         |
| LGM    | MPI-ESM            | 31       | 0.83                 | 0.71 ± 0.07                  | < 0.05               | 0.93        | 0.80 ± 0.07         |
| LGM    | MRI-CGCM3          | 31       | 0.85                 | 0.73 ± 0.05                  | < 0.05               | 0.94        | 0.81 ± 0.05         |
| LGM    | GISS-E2-R          | 31       | 0.86                 | 0.74 ± 0.06                  | < 0.05               | 1.08        | 0.93 ± 0.07         |
| LGM    | IPSL-CM5A          | 31       | 0.75                 | 0.64 ± 0.06                  | < 0.05               | 1.07        | 0.93 ± 0.07         |
| LGM    | NCAR-CCSM4         | 29       | 0.87                 | 0.76 ± 0.05                  | < 0.05               | 1.03        | 0.90 ± 0.06         |
| LGM    | MPI-ESM1-2-LR      | 31       | 0.84                 | 0.73 ± 0.06                  | < 0.05               | 1.09        | 0.94 ± 0.07         |
| LGM    | MIROC-ES2L         | 29       | 0.72                 | 0.62 ± 0.06                  | < 0.05               | 1.13        | 0.97 ± 0.08         |
| LGM    | IPSL-CM5A2         | 31       | 0.81                 | 0.71 ± 0.05                  | < 0.05               | 1.07        | 0.93 ± 0.06         |
| LGM    | HadCM3-GLAC        | 30       | 0.85                 | 0.74 ± 0.06                  | < 0.05               | 1.01        | 0.88 ± 0.05         |
| LGM    | HadCM3-ICE         | 30       | 0.84                 | 0.73 ± 0.06                  | < 0.05               | 1.00        | 0.87 ± 0.07         |
| LGM    | HadCM3-PMIP3       | 30       | 0.85                 | 0.74 ± 0.06                  | < 0.05               | 0.99        | 0.86 ± 0.06         |
| LGM    | iLOVECLIM-ICE-6G-C | 30       | 0.76                 | 0.66 ± 0.06                  | < 0.05               | 0.87        | 0.76 ± 0.06         |
| LGM    | iLOVECLIM-GLAC-1D  | 30       | 0.76                 | 0.65 ± 0.06                  | < 0.05               | 0.86        | 0.75 ± 0.06         |
| LGM    | CESM1.2            | 30       | 0.83                 | 0.71 ± 0.06                  | < 0.05               | 1.06        | 0.91 ± 0.07         |
| PI     | CNRM-CM5           | 31       | 0.83                 | 0.74 ± 0.05                  | < 0.05               | 0.76        | 0.67 ± 0.05         |
| PI     | MIROC-ESM          | 28       | 0.80                 | 0.72 ± 0.05                  | < 0.05               | 0.95        | 0.86 ± 0.06         |
| PI     | MPI-ESM            | 31       | 0.82                 | 0.73 ± 0.05                  | < 0.05               | 0.81        | 0.72 ± 0.04         |
| PI     | MRI-CGCM3          | 31       | 0.83                 | 0.74 ± 0.06                  | < 0.05               | 0.80        | 0.71 ± 0.05         |
| PI     | GISS-E2-R          | 31       | 0.82                 | 0.73 ± 0.04                  | < 0.05               | 0.92        | 0.82 ± 0.06         |
| PI     | IPSL-CM5A          | 31       | 0.80                 | 0.71 ± 0.05                  | < 0.05               | 0.93        | 0.83 ± 0.06         |
| PI     | NCAR-CCSM4         | 30       | 0.84                 | 0.75 ± 0.05                  | < 0.05               | 0.92        | 0.83 ± 0.05         |
| PI     | MPI-ESM1-2-LR      | 31       | 0.82                 | 0.72 ± 0.05                  | < 0.05               | 0.86        | 0.77 ± 0.05         |
| PI     | MIROC-ES2L         | 31       | 0.75                 | 0.67 ± 0.05                  | < 0.05               | 0.90        | 0.79 ± 0.05         |
| PI     | IPSL-CM5A2         | 31       | 0.82                 | 0.73 ± 0.06                  | < 0.05               | 0.95        | 0.84 ± 0.05         |
| PI     | HadCM3-GLAC        | 30       | 0.79                 | 0.71 ± 0.05                  | < 0.05               | 1.06        | 0.95 ± 0.07         |
| PI     | HadCM3-ICE         | 30       | 0.79                 | 0.70 ± 0.06                  | < 0.05               | 1.04        | 0.92 ± 0.07         |
| PI     | HadCM3-PMIP3       | 30       | 0.79                 | 0.71 ± 0.05                  | < 0.05               | 1.04        | 0.94 ± 0.06         |
| PI     | iLOVECLIM-ICE-6G-C | 31       | 0.69                 | 0.61 ± 0.06                  | < 0.05               | 0.80        | 0.70 ± 0.05         |
| PI     | iLOVECLIM-GLAC-1D  | 31       | 0.69                 | 0.61 ± 0.06                  | < 0.05               | 0.80        | 0.72 ± 0.06         |
| PI     | CESM1.2            | 30       | 0.82                 | 0.73 ± 0.05                  | < 0.05               | 0.97        | 0.86 ± 0.06         |



## Ocean: South Atlantic

| Period | Model              | N points | R <sup>2</sup> (Ref) | MC R <sup>2</sup> ± $\sigma$ | p-val R <sup>2</sup> | Slope (Ref) | MC Slope ± $\sigma$ |
|--------|--------------------|----------|----------------------|------------------------------|----------------------|-------------|---------------------|
| LGM    | CNRM-CM5           | 26       | 0.34                 | 0.22 ± 0.09                  | < 0.05               | 1.32        | 0.84 ± 0.21         |
| LGM    | MIROC-ESM          | 24       | 0.31                 | 0.20 ± 0.09                  | < 0.05               | 1.61        | 1.03 ± 0.25         |
| LGM    | MPI-ESM            | 26       | 0.33                 | 0.21 ± 0.09                  | < 0.05               | 1.13        | 0.70 ± 0.18         |
| LGM    | MRI-CGCM3          | 26       | 0.80                 | 0.52 ± 0.12                  | < 0.05               | 0.83        | 0.53 ± 0.08         |
| LGM    | GISS-E2-R          | 26       | 0.69                 | 0.43 ± 0.11                  | < 0.05               | 1.10        | 0.69 ± 0.10         |
| LGM    | IPSL-CM5A          | 25       | 0.33                 | 0.22 ± 0.10                  | < 0.05               | 1.29        | 0.84 ± 0.19         |
| LGM    | NCAR-CCSM4         | 23       | 0.35                 | 0.24 ± 0.09                  | < 0.05               | 0.82        | 0.55 ± 0.13         |
| LGM    | MPI-ESM1-2-LR      | 26       | 0.33                 | 0.21 ± 0.09                  | < 0.05               | 1.20        | 0.76 ± 0.20         |
| LGM    | MIROC-ES2L         | 24       | 0.27                 | 0.17 ± 0.09                  | < 0.05               | 1.00        | 0.61 ± 0.18         |
| LGM    | IPSL-CM5A2         | 25       | 0.51                 | 0.36 ± 0.11                  | < 0.05               | 1.21        | 0.82 ± 0.15         |
| LGM    | HadCM3-GLAC        | 25       | 0.49                 | 0.32 ± 0.12                  | < 0.05               | 1.21        | 0.77 ± 0.15         |
| LGM    | HadCM3-ICE         | 25       | 0.40                 | 0.27 ± 0.09                  | < 0.05               | 1.18        | 0.78 ± 0.16         |
| LGM    | HadCM3-PMIP3       | 25       | 0.53                 | 0.36 ± 0.10                  | < 0.05               | 1.15        | 0.76 ± 0.14         |
| LGM    | iLOVECLIM-ICE-6G-C | 26       | 0.58                 | 0.38 ± 0.12                  | < 0.05               | 0.84        | 0.54 ± 0.09         |
| LGM    | iLOVECLIM-GLAC-1D  | 26       | 0.57                 | 0.38 ± 0.12                  | < 0.05               | 0.82        | 0.54 ± 0.10         |
| LGM    | CESM1.2            | 24       | 0.42                 | 0.28 ± 0.11                  | < 0.05               | 0.77        | 0.50 ± 0.12         |
| PI     | CNRM-CM5           | 26       | 0.39                 | 0.27 ± 0.10                  | < 0.05               | 1.13        | 0.76 ± 0.17         |
| PI     | MIROC-ESM          | 26       | 0.27                 | 0.20 ± 0.09                  | < 0.05               | 1.43        | 0.99 ± 0.26         |
| PI     | MPI-ESM            | 26       | 0.53                 | 0.36 ± 0.11                  | < 0.05               | 1.09        | 0.73 ± 0.13         |
| PI     | MRI-CGCM3          | 26       | 0.78                 | 0.52 ± 0.10                  | < 0.05               | 0.71        | 0.49 ± 0.07         |
| PI     | GISS-E2-R          | 26       | 0.77                 | 0.50 ± 0.11                  | < 0.05               | 1.04        | 0.69 ± 0.10         |
| PI     | IPSL-CM5A          | 26       | 0.38                 | 0.28 ± 0.11                  | < 0.05               | 1.27        | 0.87 ± 0.21         |
| PI     | NCAR-CCSM4         | 25       | 0.34                 | 0.24 ± 0.10                  | < 0.05               | 1.07        | 0.72 ± 0.15         |
| PI     | MPI-ESM1-2-LR      | 26       | 0.57                 | 0.40 ± 0.11                  | < 0.05               | 1.17        | 0.78 ± 0.13         |
| PI     | MIROC-ES2L         | 26       | 0.37                 | 0.25 ± 0.10                  | < 0.05               | 1.29        | 0.87 ± 0.20         |
| PI     | IPSL-CM5A2         | 26       | 0.59                 | 0.40 ± 0.11                  | < 0.05               | 1.14        | 0.77 ± 0.13         |
| PI     | HadCM3-GLAC        | 25       | 0.45                 | 0.30 ± 0.09                  | < 0.05               | 1.23        | 0.83 ± 0.16         |
| PI     | HadCM3-ICE         | 25       | 0.46                 | 0.33 ± 0.09                  | < 0.05               | 1.22        | 0.83 ± 0.14         |
| PI     | HadCM3-PMIP3       | 25       | 0.46                 | 0.31 ± 0.09                  | < 0.05               | 1.22        | 0.81 ± 0.16         |
| PI     | iLOVECLIM-ICE-6G-C | 26       | 0.81                 | 0.55 ± 0.11                  | < 0.05               | 0.96        | 0.66 ± 0.09         |
| PI     | iLOVECLIM-GLAC-1D  | 26       | 0.81                 | 0.53 ± 0.11                  | < 0.05               | 0.96        | 0.65 ± 0.08         |
| PI     | CESM1.2            | 25       | 0.40                 | 0.29 ± 0.10                  | < 0.05               | 0.90        | 0.63 ± 0.13         |

## Ocean: North Atlantic

| Period | Model              | N points | R <sup>2</sup> (Ref) | MC R <sup>2</sup> ± $\sigma$ | p-val R <sup>2</sup> | Slope (Ref) | MC Slope ± $\sigma$ |
|--------|--------------------|----------|----------------------|------------------------------|----------------------|-------------|---------------------|
| LGM    | CNRM-CM5           | 34       | 0.22                 | 0.14 ± 0.07                  | < 0.05               | 1.31        | 0.80 ± 0.23         |
| LGM    | MIROC-ESM          | 34       | 0.26                 | 0.16 ± 0.08                  | < 0.05               | 1.24        | 0.77 ± 0.20         |
| LGM    | MPI-ESM            | 34       | 0.11                 | 0.08 ± 0.06                  | 0.06                 | 0.88        | 0.56 ± 0.26         |
| LGM    | MRI-CGCM3          | 34       | 0.24                 | 0.15 ± 0.07                  | < 0.05               | 0.81        | 0.50 ± 0.13         |
| LGM    | GISS-E2-R          | 34       | 0.12                 | 0.09 ± 0.06                  | < 0.05               | 1.00        | 0.64 ± 0.26         |
| LGM    | IPSL-CM5A          | 33       | 0.32                 | 0.22 ± 0.08                  | < 0.05               | 1.18        | 0.76 ± 0.16         |
| LGM    | NCAR-CCSM4         | 34       | 0.34                 | 0.22 ± 0.08                  | < 0.05               | 1.05        | 0.65 ± 0.13         |
| LGM    | MPI-ESM1-2-LR      | 34       | 0.12                 | 0.07 ± 0.05                  | < 0.05               | 0.86        | 0.51 ± 0.22         |
| LGM    | MIROC-ES2L         | 34       | 0.29                 | 0.19 ± 0.08                  | < 0.05               | 1.39        | 0.88 ± 0.21         |
| LGM    | IPSL-CM5A2         | 33       | 0.40                 | 0.25 ± 0.09                  | < 0.05               | 1.28        | 0.76 ± 0.16         |
| LGM    | HadCM3-GLAC        | 34       | 0.32                 | 0.20 ± 0.08                  | < 0.05               | 1.66        | 1.01 ± 0.23         |
| LGM    | HadCM3-ICE         | 34       | 0.26                 | 0.15 ± 0.06                  | < 0.05               | 1.54        | 0.91 ± 0.23         |
| LGM    | HadCM3-PMIP3       | 34       | 0.29                 | 0.19 ± 0.07                  | < 0.05               | 1.58        | 1.01 ± 0.21         |
| LGM    | iLOVECLIM-ICE-6G-C | 34       | 0.27                 | 0.19 ± 0.08                  | < 0.05               | 0.78        | 0.50 ± 0.13         |
| LGM    | iLOVECLIM-GLAC-1D  | 34       | 0.32                 | 0.20 ± 0.09                  | < 0.05               | 0.82        | 0.50 ± 0.13         |
| LGM    | CESM1.2            | 34       | 0.26                 | 0.16 ± 0.08                  | < 0.05               | 1.41        | 0.86 ± 0.23         |
| PI     | CNRM-CM5           | 34       | 0.38                 | 0.28 ± 0.09                  | < 0.05               | 1.01        | 0.72 ± 0.13         |
| PI     | MIROC-ESM          | 34       | 0.34                 | 0.25 ± 0.08                  | < 0.05               | 1.27        | 0.90 ± 0.16         |
| PI     | MPI-ESM            | 34       | 0.41                 | 0.31 ± 0.09                  | < 0.05               | 0.98        | 0.71 ± 0.12         |
| PI     | MRI-CGCM3          | 34       | 0.24                 | 0.17 ± 0.07                  | < 0.05               | 0.46        | 0.32 ± 0.07         |
| PI     | GISS-E2-R          | 34       | 0.44                 | 0.31 ± 0.08                  | < 0.05               | 1.06        | 0.74 ± 0.12         |
| PI     | IPSL-CM5A          | 34       | 0.38                 | 0.27 ± 0.07                  | < 0.05               | 0.93        | 0.65 ± 0.09         |
| PI     | NCAR-CCSM4         | 34       | 0.49                 | 0.36 ± 0.09                  | < 0.05               | 1.13        | 0.82 ± 0.13         |
| PI     | MPI-ESM1-2-LR      | 34       | 0.45                 | 0.32 ± 0.08                  | < 0.05               | 0.96        | 0.68 ± 0.11         |
| PI     | MIROC-ES2L         | 34       | 0.40                 | 0.28 ± 0.08                  | < 0.05               | 1.53        | 1.07 ± 0.18         |
| PI     | IPSL-CM5A2         | 34       | 0.44                 | 0.30 ± 0.08                  | < 0.05               | 0.97        | 0.66 ± 0.10         |
| PI     | HadCM3-GLAC        | 34       | 0.43                 | 0.30 ± 0.09                  | < 0.05               | 1.84        | 1.28 ± 0.20         |
| PI     | HadCM3-ICE         | 34       | 0.44                 | 0.31 ± 0.09                  | < 0.05               | 1.85        | 1.30 ± 0.22         |
| PI     | HadCM3-PMIP3       | 34       | 0.44                 | 0.32 ± 0.09                  | < 0.05               | 1.85        | 1.32 ± 0.19         |
| PI     | iLOVECLIM-ICE-6G-C | 34       | 0.56                 | 0.41 ± 0.09                  | < 0.05               | 0.90        | 0.65 ± 0.08         |
| PI     | iLOVECLIM-GLAC-1D  | 34       | 0.56                 | 0.40 ± 0.09                  | < 0.05               | 0.90        | 0.63 ± 0.09         |
| PI     | CESM1.2            | 34       | 0.48                 | 0.35 ± 0.09                  | < 0.05               | 1.10        | 0.79 ± 0.13         |

## Ocean: Pacific

| Period | Model              | N points | R <sup>2</sup> (Ref) | MC R <sup>2</sup> ± $\sigma$ | p-val R <sup>2</sup> | Slope (Ref) | MC Slope ± $\sigma$ |
|--------|--------------------|----------|----------------------|------------------------------|----------------------|-------------|---------------------|
| LGM    | CNRM-CM5           | 75       | 0.10                 | 0.09 ± 0.02                  | < 0.05               | 0.46        | 0.40 ± 0.05         |
| LGM    | MIROC-ESM          | 71       | 0.39                 | 0.35 ± 0.04                  | < 0.05               | 0.81        | 0.71 ± 0.05         |
| LGM    | MPI-ESM            | 75       | 0.76                 | 0.68 ± 0.04                  | < 0.05               | 0.67        | 0.60 ± 0.03         |
| LGM    | MRI-CGCM3          | 75       | 0.31                 | 0.28 ± 0.03                  | < 0.05               | 0.56        | 0.50 ± 0.03         |
| LGM    | GISS-E2-R          | 75       | 0.45                 | 0.39 ± 0.04                  | < 0.05               | 0.84        | 0.74 ± 0.05         |
| LGM    | IPSL-CM5A          | 75       | 0.66                 | 0.59 ± 0.04                  | < 0.05               | 0.91        | 0.81 ± 0.04         |
| LGM    | NCAR-CCSM4         | 75       | 0.27                 | 0.24 ± 0.03                  | < 0.05               | 0.49        | 0.43 ± 0.04         |
| LGM    | MPI-ESM1-2-LR      | 75       | 0.68                 | 0.60 ± 0.04                  | < 0.05               | 0.77        | 0.69 ± 0.04         |
| LGM    | MIROC-ES2L         | 75       | 0.62                 | 0.54 ± 0.04                  | < 0.05               | 1.01        | 0.90 ± 0.04         |
| LGM    | IPSL-CM5A2         | 75       | 0.74                 | 0.66 ± 0.04                  | < 0.05               | 0.80        | 0.71 ± 0.03         |
| LGM    | HadCM3-GLAC        | 74       | 0.53                 | 0.47 ± 0.04                  | < 0.05               | 0.86        | 0.76 ± 0.04         |
| LGM    | HadCM3-ICE         | 74       | 0.68                 | 0.60 ± 0.04                  | < 0.05               | 0.85        | 0.76 ± 0.04         |
| LGM    | HadCM3-PMIP3       | 71       | 0.71                 | 0.63 ± 0.04                  | < 0.05               | 0.91        | 0.81 ± 0.04         |
| LGM    | iLOVECLIM-ICE-6G-C | 73       | 0.75                 | 0.67 ± 0.03                  | < 0.05               | 0.91        | 0.81 ± 0.04         |
| LGM    | iLOVECLIM-GLAC-1D  | 73       | 0.74                 | 0.67 ± 0.04                  | < 0.05               | 0.88        | 0.79 ± 0.04         |
| LGM    | CESM1.2            | 75       | 0.71                 | 0.63 ± 0.04                  | < 0.05               | 0.69        | 0.62 ± 0.03         |
| PI     | CNRM-CM5           | 75       | 0.84                 | 0.75 ± 0.03                  | < 0.05               | 0.82        | 0.73 ± 0.03         |
| PI     | MIROC-ESM          | 73       | 0.55                 | 0.49 ± 0.04                  | < 0.05               | 0.80        | 0.72 ± 0.04         |
| PI     | MPI-ESM            | 75       | 0.80                 | 0.72 ± 0.03                  | < 0.05               | 0.68        | 0.62 ± 0.02         |
| PI     | MRI-CGCM3          | 75       | 0.82                 | 0.74 ± 0.03                  | < 0.05               | 0.84        | 0.76 ± 0.03         |
| PI     | GISS-E2-R          | 75       | 0.81                 | 0.73 ± 0.03                  | < 0.05               | 0.90        | 0.80 ± 0.03         |
| PI     | IPSL-CM5A          | 75       | 0.69                 | 0.63 ± 0.03                  | < 0.05               | 0.94        | 0.85 ± 0.04         |
| PI     | NCAR-CCSM4         | 75       | 0.82                 | 0.74 ± 0.03                  | < 0.05               | 0.78        | 0.70 ± 0.02         |
| PI     | MPI-ESM1-2-LR      | 75       | 0.78                 | 0.70 ± 0.03                  | < 0.05               | 0.71        | 0.63 ± 0.02         |
| PI     | MIROC-ES2L         | 75       | 0.69                 | 0.62 ± 0.03                  | < 0.05               | 0.78        | 0.71 ± 0.03         |
| PI     | IPSL-CM5A2         | 75       | 0.69                 | 0.62 ± 0.04                  | < 0.05               | 0.98        | 0.88 ± 0.04         |
| PI     | HadCM3-GLAC        | 75       | 0.75                 | 0.67 ± 0.03                  | < 0.05               | 0.86        | 0.77 ± 0.03         |
| PI     | HadCM3-ICE         | 75       | 0.75                 | 0.67 ± 0.04                  | < 0.05               | 0.86        | 0.78 ± 0.03         |
| PI     | HadCM3-PMIP3       | 75       | 0.75                 | 0.68 ± 0.03                  | < 0.05               | 0.86        | 0.78 ± 0.03         |
| PI     | iLOVECLIM-ICE-6G-C | 75       | 0.80                 | 0.71 ± 0.03                  | < 0.05               | 0.71        | 0.63 ± 0.03         |
| PI     | iLOVECLIM-GLAC-1D  | 75       | 0.80                 | 0.72 ± 0.03                  | < 0.05               | 0.71        | 0.64 ± 0.03         |
| PI     | CESM1.2            | 75       | 0.76                 | 0.69 ± 0.03                  | < 0.05               | 0.76        | 0.69 ± 0.03         |

## Ocean: Southern Ocean

| Period | Model              | N points | R <sup>2</sup> (Ref) | MC R <sup>2</sup> ± $\sigma$ | p-val R <sup>2</sup> | Slope (Ref) | MC Slope ± $\sigma$ |
|--------|--------------------|----------|----------------------|------------------------------|----------------------|-------------|---------------------|
| LGM    | CNRM-CM5           | 7        | 0.81                 | 0.42 ± 0.23                  | < 0.05               | 1.91        | 0.94 ± 0.40         |
| LGM    | MIROC-ESM          | 7        | 0.82                 | 0.41 ± 0.25                  | < 0.05               | 1.09        | 0.51 ± 0.25         |
| LGM    | MPI-ESM            | 7        | 0.83                 | 0.44 ± 0.25                  | < 0.05               | 1.07        | 0.51 ± 0.31         |
| LGM    | MRI-CGCM3          | 7        | 0.89                 | 0.47 ± 0.25                  | < 0.05               | 1.88        | 0.93 ± 0.41         |
| LGM    | GISS-E2-R          | 7        | 0.81                 | 0.40 ± 0.25                  | < 0.05               | 1.59        | 0.67 ± 0.39         |
| LGM    | IPSL-CM5A          | 7        | 0.86                 | 0.46 ± 0.22                  | < 0.05               | 0.72        | 0.35 ± 0.15         |
| LGM    | NCAR-CCSM4         | 7        | 0.70                 | 0.39 ± 0.24                  | < 0.05               | 0.64        | 0.31 ± 0.18         |
| LGM    | MPI-ESM1-2-LR      | 7        | 0.78                 | 0.40 ± 0.22                  | < 0.05               | 1.06        | 0.52 ± 0.25         |
| LGM    | IPSL-CM5A2         | 7        | 0.75                 | 0.42 ± 0.21                  | < 0.05               | 0.79        | 0.42 ± 0.18         |
| LGM    | iLOVECLIM-ICE-6G-C | 7        | 0.64                 | 0.34 ± 0.24                  | < 0.05               | 0.43        | 0.21 ± 0.11         |
| LGM    | CESM1.2            | 7        | 0.59                 | 0.31 ± 0.22                  | < 0.05               | 0.61        | 0.29 ± 0.19         |
| PI     | CNRM-CM5           | 7        | 0.93                 | 0.38 ± 0.25                  | < 0.05               | 1.63        | 0.60 ± 0.32         |
| PI     | MIROC-ESM          | 7        | 0.93                 | 0.38 ± 0.23                  | < 0.05               | 1.33        | 0.52 ± 0.32         |
| PI     | MPI-ESM            | 7        | 0.95                 | 0.42 ± 0.26                  | < 0.05               | 1.25        | 0.48 ± 0.24         |
| PI     | MRI-CGCM3          | 7        | 0.82                 | 0.33 ± 0.24                  | < 0.05               | 1.52        | 0.54 ± 0.31         |
| PI     | GISS-E2-R          | 7        | 0.85                 | 0.33 ± 0.24                  | < 0.05               | 0.91        | 0.31 ± 0.21         |
| PI     | IPSL-CM5A          | 7        | 0.91                 | 0.41 ± 0.24                  | < 0.05               | 1.29        | 0.52 ± 0.24         |
| PI     | NCAR-CCSM4         | 7        | 0.92                 | 0.39 ± 0.27                  | < 0.05               | 0.67        | 0.24 ± 0.15         |
| PI     | MPI-ESM1-2-LR      | 7        | 0.95                 | 0.41 ± 0.24                  | < 0.05               | 1.28        | 0.51 ± 0.29         |
| PI     | MIROC-ES2L         | 7        | 0.79                 | 0.32 ± 0.23                  | < 0.05               | 0.96        | 0.31 ± 0.23         |
| PI     | IPSL-CM5A2         | 7        | 0.92                 | 0.38 ± 0.25                  | < 0.05               | 0.79        | 0.30 ± 0.20         |
| PI     | HadCM3-GLAC        | 7        | 0.78                 | 0.36 ± 0.23                  | < 0.05               | 0.69        | 0.25 ± 0.17         |
| PI     | HadCM3-ICE         | 7        | 0.82                 | 0.40 ± 0.24                  | < 0.05               | 0.72        | 0.29 ± 0.14         |
| PI     | HadCM3-PMIP3       | 7        | 0.82                 | 0.34 ± 0.23                  | < 0.05               | 0.72        | 0.28 ± 0.14         |
| PI     | iLOVECLIM-ICE-6G-C | 7        | 0.78                 | 0.42 ± 0.26                  | < 0.05               | 1.00        | 0.41 ± 0.23         |
| PI     | iLOVECLIM-GLAC-1D  | 7        | 0.78                 | 0.32 ± 0.24                  | < 0.05               | 1.00        | 0.32 ± 0.25         |
| PI     | CESM1.2            | 7        | 0.91                 | 0.36 ± 0.27                  | < 0.05               | 0.79        | 0.30 ± 0.17         |



## Ocean: North Indian

| Period | Model              | N points | R <sup>2</sup> (Ref) | MC R <sup>2</sup> ± $\sigma$ | p-val R <sup>2</sup> | Slope (Ref) | MC Slope ± $\sigma$ |
|--------|--------------------|----------|----------------------|------------------------------|----------------------|-------------|---------------------|
| LGM    | CNRM-CM5           | 27       | 0.19                 | 0.13 ± 0.06                  | < 0.05               | 0.80        | 0.56 ± 0.16         |
| LGM    | MIROC-ESM          | 27       | 0.15                 | 0.12 ± 0.06                  | < 0.05               | 0.67        | 0.49 ± 0.14         |
| LGM    | MPI-ESM            | 27       | 0.15                 | 0.13 ± 0.07                  | < 0.05               | 0.42        | 0.33 ± 0.10         |
| LGM    | MRI-CGCM3          | 27       | 0.31                 | 0.22 ± 0.08                  | < 0.05               | 0.72        | 0.52 ± 0.10         |
| LGM    | GISS-E2-R          | 27       | 0.14                 | 0.12 ± 0.05                  | 0.05                 | 0.69        | 0.54 ± 0.13         |
| LGM    | IPSL-CM5A          | 27       | 0.22                 | 0.17 ± 0.08                  | < 0.05               | 0.59        | 0.44 ± 0.12         |
| LGM    | NCAR-CCSM4         | 26       | 0.15                 | 0.11 ± 0.06                  | 0.05                 | 0.74        | 0.53 ± 0.19         |
| LGM    | MPI-ESM1-2-LR      | 27       | 0.16                 | 0.13 ± 0.07                  | < 0.05               | 0.46        | 0.35 ± 0.10         |
| LGM    | MIROC-ES2L         | 25       | 0.06                 | 0.05 ± 0.04                  | 0.24                 | 0.43        | 0.31 ± 0.15         |
| LGM    | IPSL-CM5A2         | 27       | 0.21                 | 0.18 ± 0.08                  | < 0.05               | 0.56        | 0.44 ± 0.10         |
| LGM    | HadCM3-GLAC        | 26       | 0.25                 | 0.19 ± 0.08                  | < 0.05               | 0.82        | 0.61 ± 0.14         |
| LGM    | HadCM3-ICE         | 27       | 0.37                 | 0.27 ± 0.08                  | < 0.05               | 1.05        | 0.76 ± 0.14         |
| LGM    | HadCM3-PMIP3       | 27       | 0.35                 | 0.27 ± 0.08                  | < 0.05               | 1.07        | 0.81 ± 0.17         |
| LGM    | iLOVECLIM-ICE-6G-C | 27       | 0.25                 | 0.19 ± 0.08                  | < 0.05               | 0.56        | 0.42 ± 0.11         |
| LGM    | iLOVECLIM-GLAC-1D  | 27       | 0.25                 | 0.20 ± 0.08                  | < 0.05               | 0.58        | 0.43 ± 0.10         |
| LGM    | CESM1.2            | 26       | 0.14                 | 0.11 ± 0.06                  | 0.06                 | 1.06        | 0.77 ± 0.23         |
| PI     | HadCM3-GLAC        | 27       | 0.10                 | 0.07 ± 0.06                  | 0.10                 | 0.76        | 0.46 ± 0.22         |
| PI     | HadCM3-ICE         | 27       | 0.10                 | 0.08 ± 0.06                  | 0.11                 | 0.76        | 0.50 ± 0.23         |
| PI     | HadCM3-PMIP3       | 27       | 0.10                 | 0.07 ± 0.05                  | 0.11                 | 0.76        | 0.50 ± 0.22         |

**Table S1:** Coefficients of determination (R<sup>2</sup>) and regression slopes for each ocean basin and each model simulation, evaluated separately for the LGM and pre-industrial (PI) periods. These statistics correspond to the linear relationships between surface absolute density (kg/m<sup>3</sup>) from proxy-based reconstructions (x-axis) and model simulations (y-axis), as shown in the previous figure. Values are reported for both standard (ref) least-squares regression and uncertainty-aware estimates using Monte Carlo (MC) simulations (n = 10,000), which propagate uncertainties from the reconstructions. Standard errors for MC estimates reflect variability across iterations. Only results with significant relationships (p ≤ 0.05) for slope (MC) and/or R<sup>2</sup> (MC) are shown. Shading indicates significance and performance: light green for p-values ≤ 0.05, for R<sup>2</sup> (Ref or MC) > 0.5, and for slope (Ref or MC) values between 0.8 and 1.2.
